# Supplementary material for: Self-assembly of quaternary ammonium gemini surfactants in cyclohexane upon reinforcement by simple counterions
Source: Royal Society of Chemistry journal article supplement (doi:10.1039/c8ra02720j), 2018-01-01
Supplement: c8ra02720j1.pdf [file c8ra02720j1.pdf]

## Supporting Information

### Self-assembly of quaternary ammonium gemini surfactants in cyclohexane upon reinforcement of simple counterions

Sheng-lu Deng , Jian-xi Zhao\* and Zhi-wen Wen

Institute of Colloid and Interface Chemistry, College of Chemistry and Chemical Engineering,  
Fuzhou University, Fuzhou, Fujian 350108, China

#### 12-2-12/NaBez:

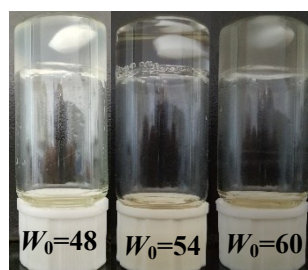

#### 12-6-12/NaBez:

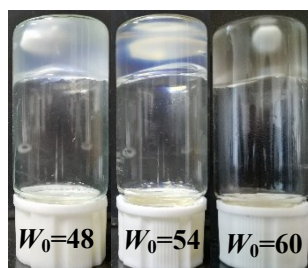

#### 12-10-12/NaBez:

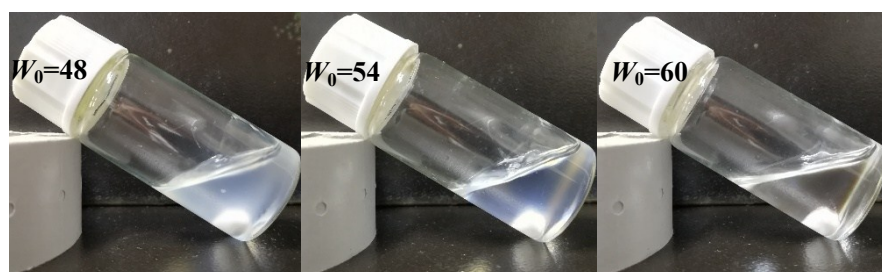

**Fig. S1** Sample appearances of equi-charged mixtures of 12-2-12/NaBez (top), 12-6-12/NaBez (middle) and 12-10-12/NaBez (bottom) in cyclohexane with a gemini concentration of 200 mmol·L<sup>-1</sup> and marked  $W_0$  at 30 °C.

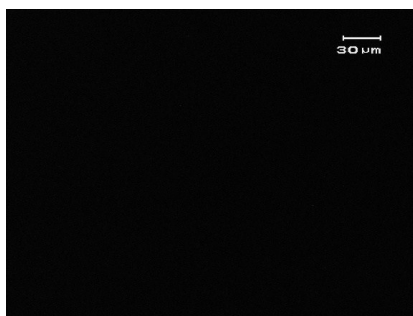

**Fig. S2** Polarising micrograph of equi-charged mixture of 12-2(10)-12/NaBez (200/400 mmol·L<sup>-1</sup>).

**12-2-12/NaSal:**

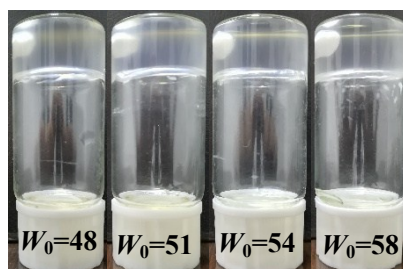

**12-6-12/NaSal:**

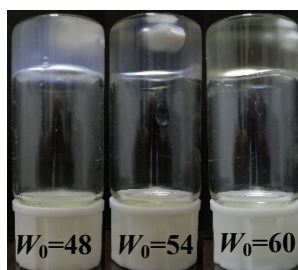

**12-10-12/NaSal:**

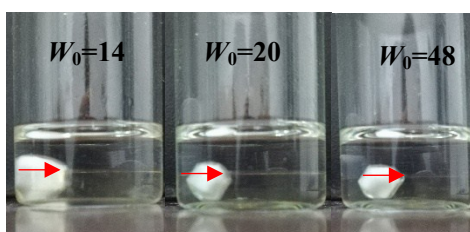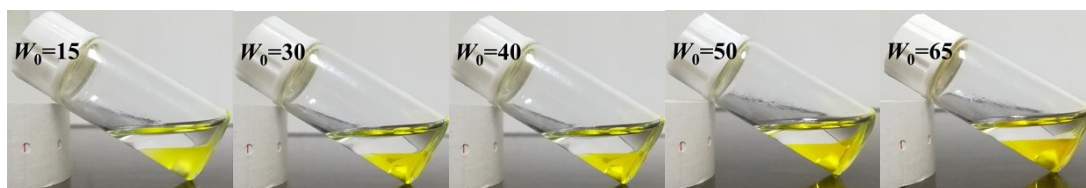

**Fig. S3** Sample appearances of equi-charged mixtures of 12-2-12/NaSal (top), 12-6-12/NaSal (middle) and 12-10-12/NaSal (bottom) in cyclohexane with a gemini concentration of 200

mmol·L<sup>-1</sup> and marked  $W_0$  at 30 °C. In the 12-10-12/NaSal, oil two-phases were formed, where methyl orange dye was solubilised in the surfactant aggregates so as to indicate two phases more clearly.

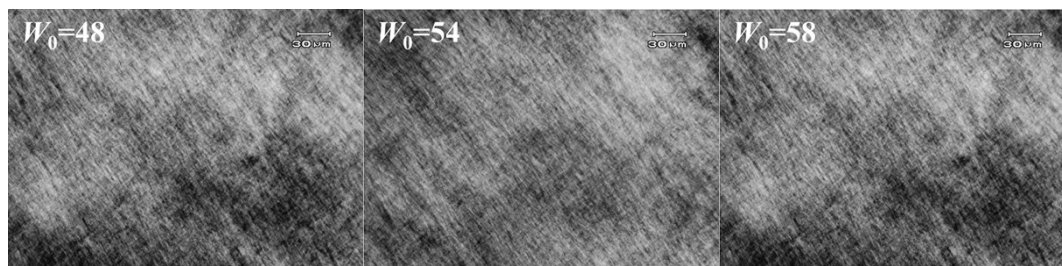

**Fig.S4** Polarising micrographs of eqi-charged mixtures of 12-2-12/NaSal (200/400 mmol·L<sup>-1</sup>).

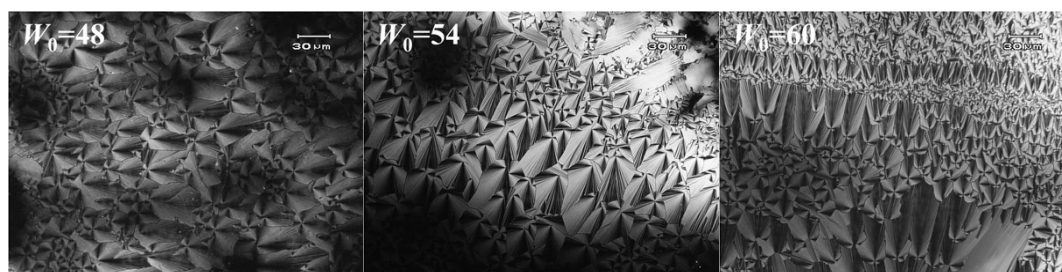

**Fig. S5** Polarising micrographs of eqi-charged mixtures of 12-6-12/NaSal (200/400 mmol·L<sup>-1</sup>).

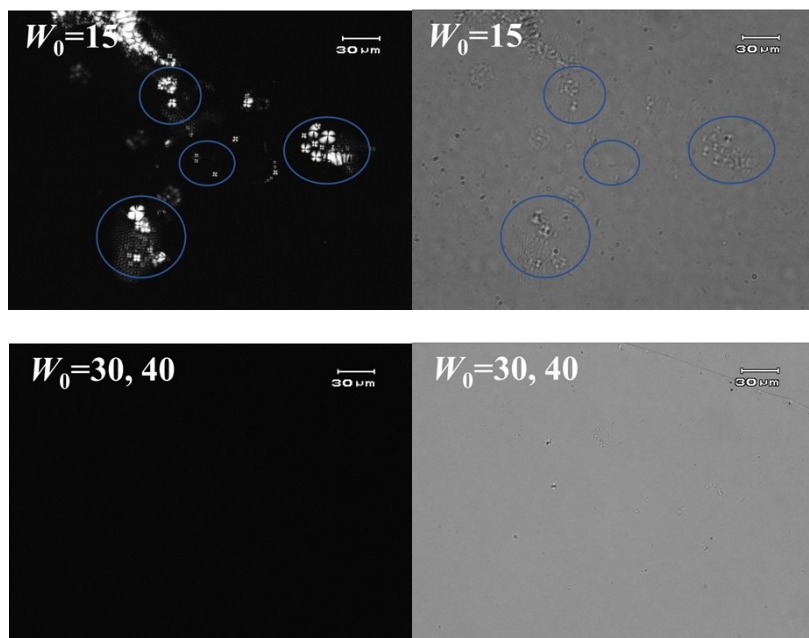

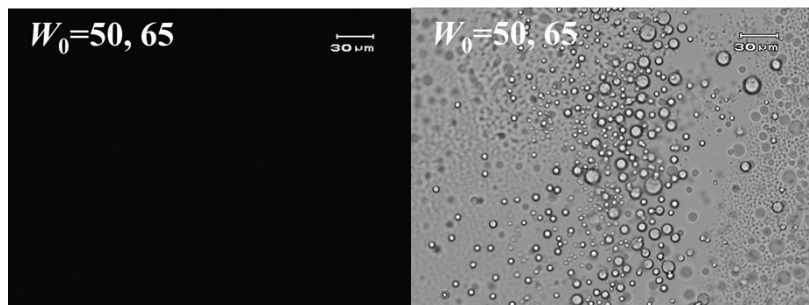

**Fig. S6** Micrographs of some 12-10-12/NaSal ( $200/400 \text{ mmol}\cdot\text{L}^{-1}$ ) samples with (left rows) and without (right rows) a polariser.

**12-2-12/NaBres:**

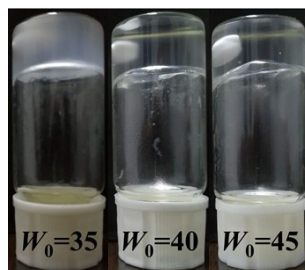

**12-6-12/NaBres:**

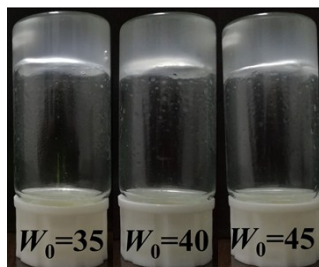

**12-10-12/NaBres:**

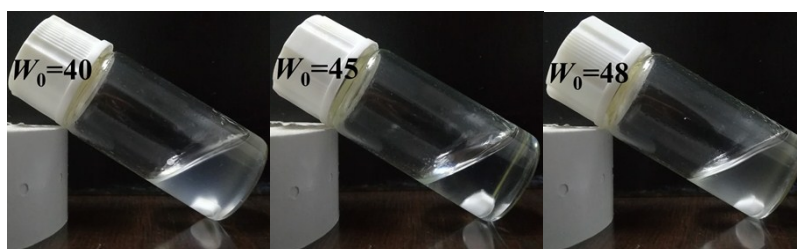

**Fig. S7** Sample appearances of equi-charged mixtures of 12-2-12/NaBres (top), 12-6-12/NaBres (middle) and 12-10-12/NaBres (bottom) in cyclohexane with a gemini concentration of  $200 \text{ mmol}\cdot\text{L}^{-1}$  and marked  $W_0$  at  $30 \text{ }^\circ\text{C}$ .

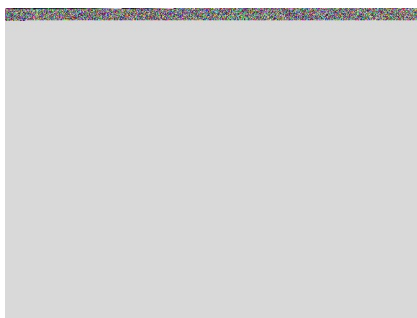

**Fig. S8** Polarising micrograph of equi-charged mixture of 12-2(10)-12/NaBres (200/400 mmol·L<sup>-1</sup>).
